# Supplementary material for: Association between base excess level at hospital arrival and neurological outcomes of adult out-of-hospital cardiac arrest: A multicentre cohort study
Source: Research Square preprint supplement (doi:10.21203/rs.3.rs-6257805/v1), 2025-04-01
Supplement: Supplementary file 1 [file a4ef933567bcc4124bb67743.docx]

**Additional file 1. Missing data**

| Variables | Total  n = 6,066 |
| --- | --- |
|
| ***Prehospital characteristics*** |  |
| Age | 0 (0%) |
| Male | 0 (0%) |
| Cardiac cause | 0 (0%) |
| Bystander CPR | 0 (0%) |
| Bystander shock delivery  by an AED | 0 (0%) |
| First documented rhythm | 0 (0%) |
| Defibrillation by EMS | 0 (0%) |
| Adrenaline administration by EMS | 0 (0%) |
| Advanced airway management by EMS | 0 (0%) |
| No flow time for CPR | 188 (3.1%) |
| Time from witness to hospital arrival | 48 (0.8%) |
| ***In-hospital characteristics*** |  |
| First documented rhythm | 0 (0%) |
| Defibrillation in hospital | 0 (0%) |
| Time from hospital arrival to blood test | 0 (0%) |
| Coronary angiography | 0 (0%) |
| Target temperature management | 0 (0%) |
| Extracorporeal life support initiated after blood test | 0 (0%) |
| Lactate | 71 (1.2%) |
| HCO3– | 29 (0.5%) |
| PaCO2 | 1 (0.02%) |
| Creatinine | 1,613 (26.6%) |
| ***Outcome*** |  |
| Favourable neurological survival | 0 (0%) |
| Survival | 0 (0%) |

Numbers and percentages (%). CPR, cardiopulmonary resuscitation; AED, automated external defibrillator; EMS, emergency medical services
