# Supplementary material for: Association between base excess level at hospital arrival and neurological outcomes of adult out-of-hospital cardiac arrest: A multicentre cohort study
Source: Research Square preprint supplement (doi:10.21203/rs.3.rs-6257805/v1), 2025-04-01
Supplement: Supplementary file 2 [file ace39e603c1c053dd39f81be.docx]

**Additional file 3. Non-linear relationship between base excess values and the estimated probability of favourable neurological outcome
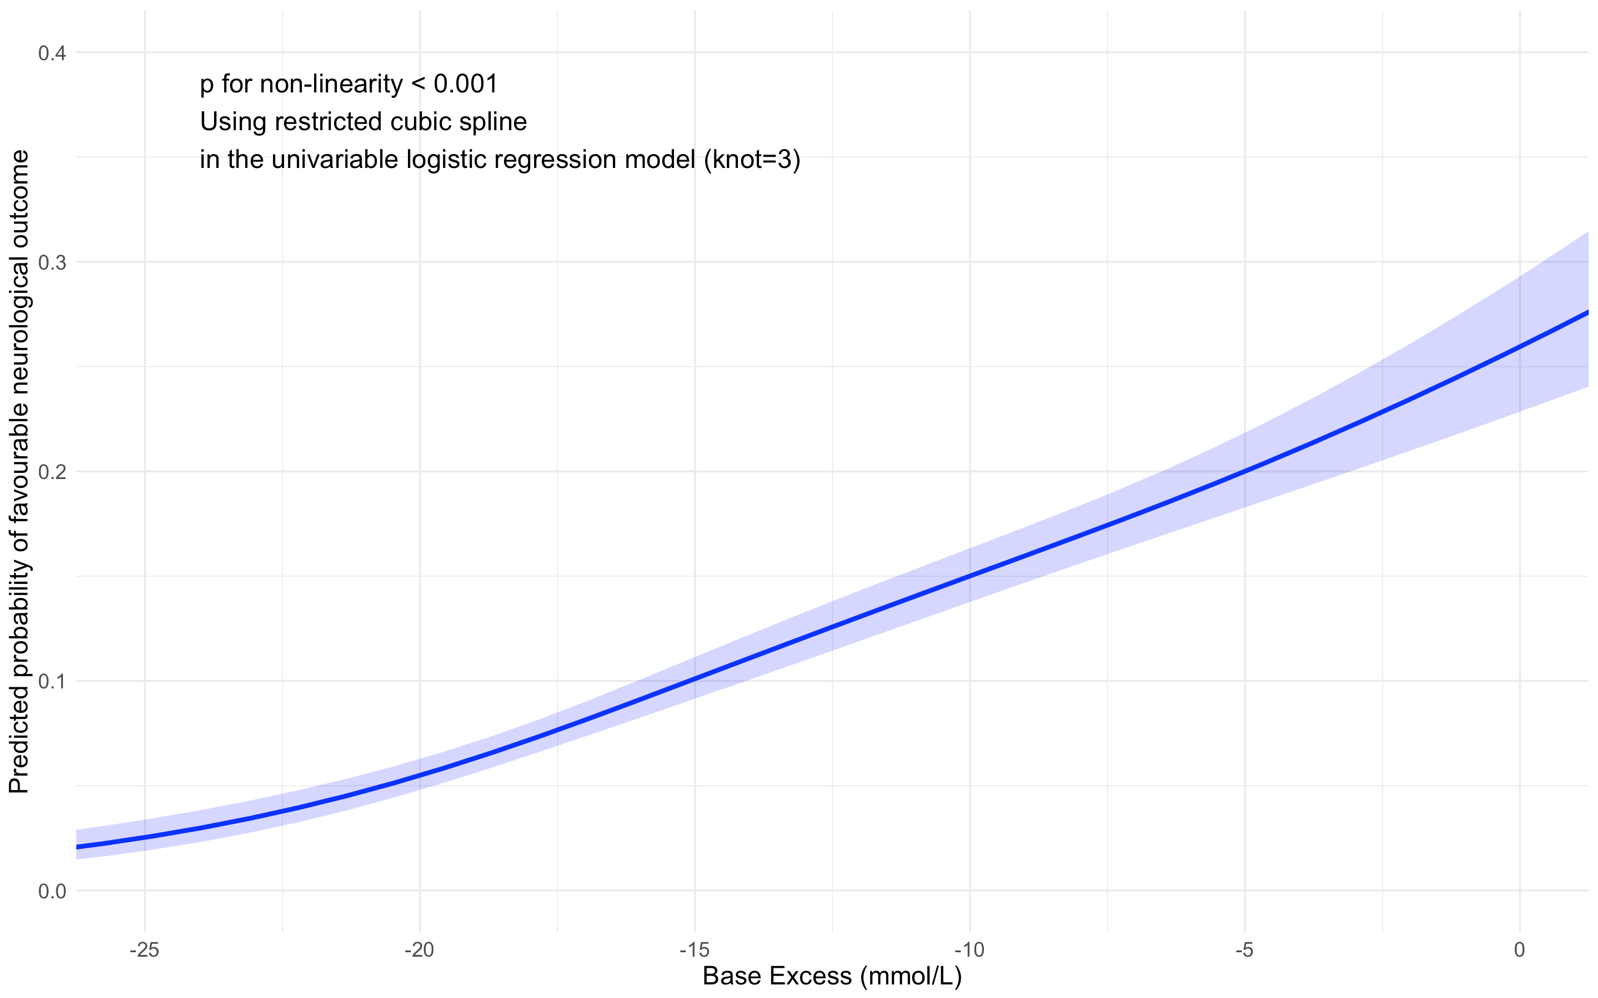
**

The lines indicate estimated probability, and the shaded areas represent the 95 % confidence intervals.
