# Supplementary material for: Association between base excess level at hospital arrival and neurological outcomes of adult out-of-hospital cardiac arrest: A multicentre cohort study
Source: Research Square preprint supplement (doi:10.21203/rs.3.rs-6257805/v1), 2025-04-01
Supplement: Supplementary file 3 [file bdeea4def112a949f180c250.docx]

**Additional file 2. Outcomes after out-of-hospital cardiac arrest according to base excess values by sensitivity analysis.**

|  | Base excess (BE), mmol/L | | | | |
| --- | --- | --- | --- | --- | --- |
| Quartile 1  (BE −21.1)  n = 1,528 | Quartile 2  (−21.1< BE ≤ −15.7)  n = 1,493 | Quartile 3  (−15.7 < BE ≤ −10.4)  n = 1,515 | Quartile 4  (BE > −10.4)  n = 1,530 | p for trend |
| ***Primary outcome*** |  |  |  |  |  |
| Favourable neurological survival, n (%) | 49 (3.2) | 70 (4.7) | 148 (9.8) | 359 (23.5) | < 0.001 |
| Crude OR (95% CI) | 0.11 (0.079–0.15) | 0.16 (0.12–0.21) | 0.35 (0.29–0.43) | Reference |  |
| Adjusted OR (95% CI)† | 0.17 (0.11–0.26) | 0.27 (0.19–0.38) | 0.43 (0.31–0.58) | Reference |  |
| ***Secondary outcome*** |  |  |  |  |  |
| Survival, n (%) | 101 (6.6) | 170 (11.4) | 270 (17.8) | 480 (31.4) | < 0.001 |
| Crude OR (95% CI) | 0.15 (0.12–0.19) | 0.28 (0.23–0.34) | 0.47 (0.40–0.56) | Reference |  |
| Adjusted OR (95% CI)† | 0.21 (0.16–0.28) | 0.40 (0.31–0.51) | 0.56 (0.45–0.71) | Reference |  |

Abbreviations: OR, odds ratio; CI, confidence interval

Partial pressure of arterial carbon dioxide and creatinine on hospital arrival were added to the primary analysis model.
